# Supplementary material for: Ultimate design principles and fabrication process for high-energy-density solid-state pouch cells based on solid polymer electrolytes
Source: Research Square preprint supplement (doi:10.21203/rs.3.rs-2748501/v1), 2023-05-16
Supplement: Supplementary file 1 [file 1928b253d90e21e9fabe0816.pdf]

## Supplementary Information

### Ultimate design principles and fabrication process for high-energy-density solid-state pouch cells based on solid polymer electrolytes

Wonmi Lee<sup>a,†</sup>, Taegyun Yu<sup>a,†</sup>, Juho Lee<sup>a,b</sup>, Sungbin Jang<sup>a</sup>, Juhee Kim<sup>a</sup>, Yujin Han<sup>a</sup>,  
Sunghun Choi<sup>c</sup>, Sinho Choi<sup>a</sup>, Taehee Kim<sup>a</sup>, Sang-Hoon Park<sup>a</sup>, Wooyoung Jin<sup>a</sup>, Gyu Jin Song<sup>a</sup>,  
Daeil Kim<sup>d</sup>, Bo-Yun Jang<sup>d</sup>, Dong-Hwa Seo<sup>b</sup>, Sung-Kyun Jung<sup>\*,b</sup>, Jinsoo Kim<sup>\*,a</sup>

<sup>a</sup>Ulsan Advanced Energy Technology R&D Center, Korea Institute of Energy Research, Ulsan, Republic of Korea

<sup>b</sup>Department of Energy Engineering, School of Energy and Chemical Engineering, Ulsan National Institute of Science and Technology (UNIST), Ulsan, Republic of Korea

<sup>c</sup>Gwangju Clean Energy Research Center, Korea Institute of Energy Research, Gwangju, Republic of Korea

<sup>d</sup>Energy Storage Laboratory, Korea Institute of Energy Research, Daejeon, Republic of Korea

\* Email addresses of corresponding authors.

Tel: +82-52-702-2534, [jkim@kier.re.kr](mailto:jkim@kier.re.kr) (J. Kim)

Tel: +82-52-217-3030, [skjung@unist.ac.kr](mailto:skjung@unist.ac.kr) (S.-K. Jung)

Keywords: solid-state batteries; electrode density; isostatic press; electrode–solid electrolyte composite design; energy density

1 **Supplementary Note 1. Calculation of ionic ASR of the particle composing the composite**  
2 **cathode**

3 For calculation of the ionic ASR of the particle composing the composite cathode, there is  
4 the assumption that the particle has a core-shell structure. Here, the core and shell consist of  
5 the AM and SE, respectively.

6

7 **Equation (1):**

$$8 \quad R = \rho \frac{l}{A}$$

9 (Here,  $R$  is the ionic ASR of the particle,  $\rho$  is the density of the particle,  $l$  is the length of  
10 the particle, and  $A$  is the area of the particle.)

11

12 **Equation (2):**

$$13 \quad dR = \rho \frac{dl}{dA} = \rho \frac{r d\theta}{2\pi r \sin\theta dr} = \frac{\rho d\theta}{2\pi \sin\theta dr}$$

14 (Here,  $r$  is the radius of the particle,  $\theta$  is the angle between the radius and the core-surface  
15 distance.)

16

17 **Equation (3):**

$$18 \quad dR = \frac{\rho}{2\pi (r_2 - r_1) \sin\theta} \frac{d\theta}{dr} = \frac{\rho}{2\pi (r_2 - r_1)} \int_{\theta}^{\pi-\theta} \frac{d\theta}{\sin\theta}$$

19 (Here,  $r_2$  is the radius of the core-shell particle,  $r_1$  is the radius of the core side.)

20

21 **Equation (4):**

$$22 \quad R = \frac{1}{2\pi\sigma (r_2 - r_1)} \ln \left( \frac{1 + \cos\theta}{1 - \cos\theta} \right)$$

1 
$$= \frac{1}{2\pi\sigma (r_2 - r_1)} \ln \left( \frac{r_2 + r_2 \cos\theta}{r_2 - r_2 \cos\theta} \right)$$

2 
$$= \frac{1}{2\pi\sigma (r_2 - r_1)} \ln \left( \frac{r_2 + x}{r_2 - x} \right)$$

3 (Here,  $x$  is the core–surface distance, which is  $r_2 \cos\theta$ .  $0 < \theta < \frac{\pi}{2}$ ,  $0 < r_2 \cos\theta < 1$ .)

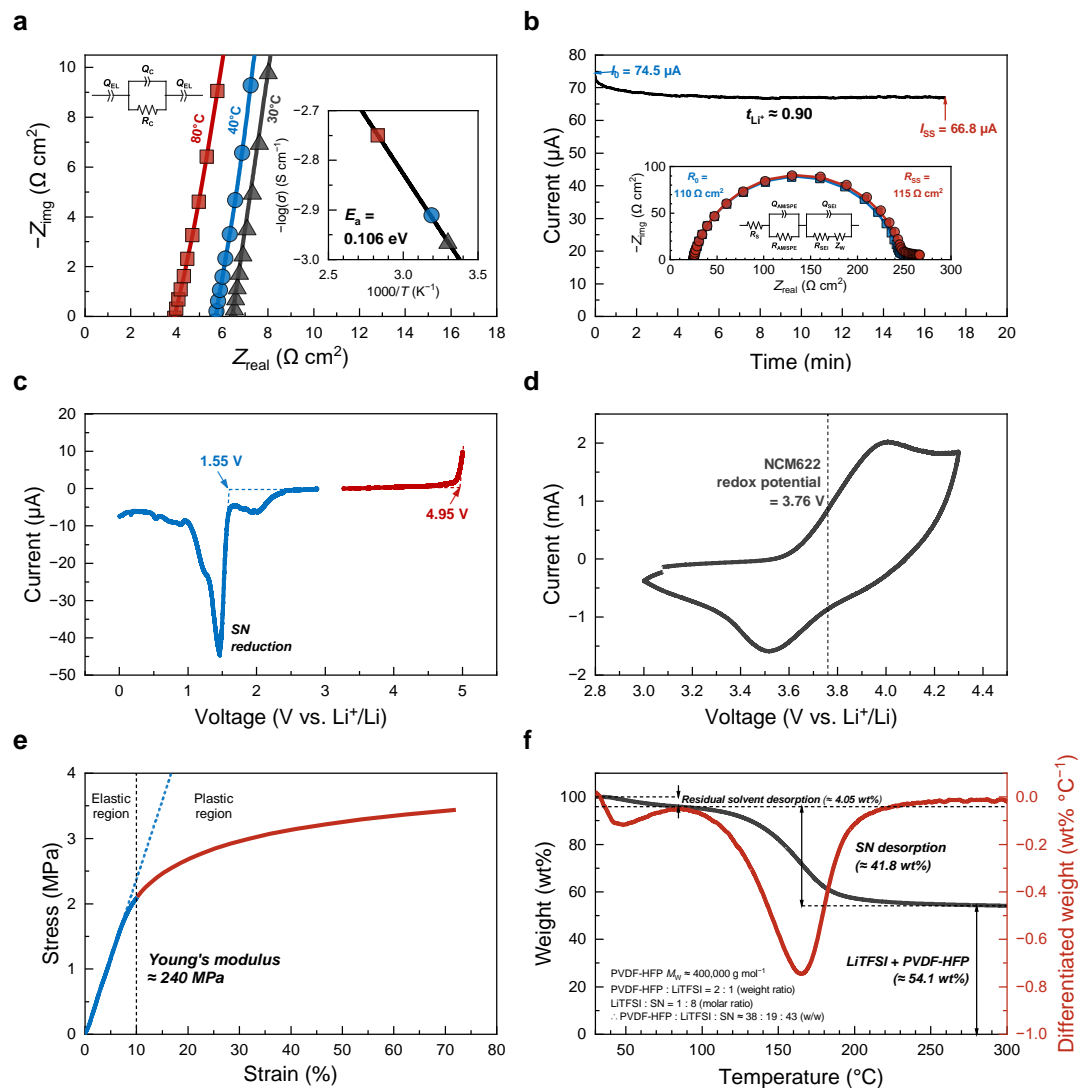

1

2 **Supplementary Fig. 1: Properties and electrochemical performance of freestanding solid**  
 3 **polymer electrolyte**

4 **a**, EIS data of SS/SPE/SS coin cell and Arrhenius plot for calculation of the activation energy  
 5 of the SPE. **b**, EIS and CA results of Li/SPE/Li coin cell for calculation of the lithium-ion  
 6 transference number. **c**, LSV curve of Li/SPE/SS coin cell to show electrochemical stable  
 7 window. **d**, CV curve of Li/SPE/NCM622 coin cell to show the redox potential of NCM622 as  
 8 an AM in the cathode. **e**, DMA result showing the mechanical strength of the SPE. **f**, TGA  
 9 curve showing the thermal stability of the SPE.

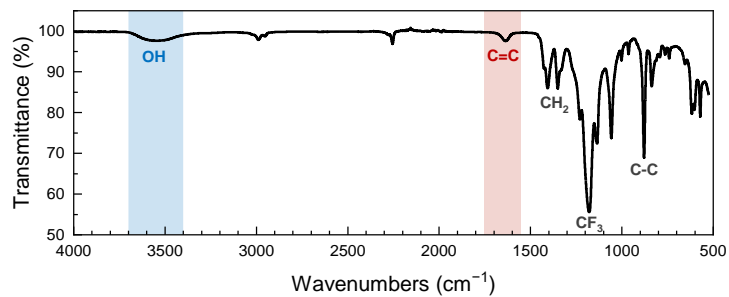

1

2 **Supplementary Fig. 2:** FTIR data of SPE (consisting of PVDF-HFP as the polymer matrix,  
3 LiTFSI as the Li salt, and SN as a plasticizer).

4

5 The partial dehydrofluorination of PVDF-HFP can improve the mobility of ions, leading to  
6 high ionic conductivity, as proven by the appearance of hydroxyl and C=C double bonds in the  
7 FTIR data<sup>S1</sup>.

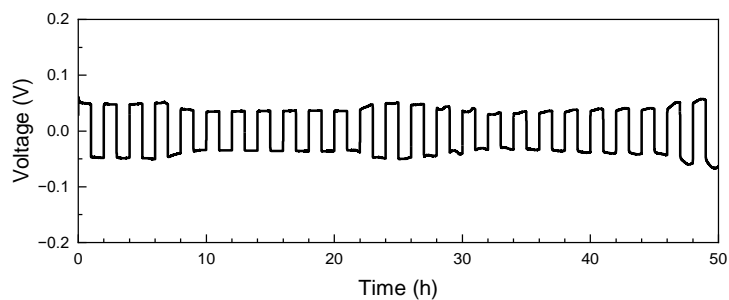

1

2 **Supplementary Fig. 3:** Li symmetric cycling result of Li/SPE/Li coin cell with current density  
3 of  $\pm 0.15 \text{ mA cm}^{-2}$  for 1 h as each cycle.

4

5 The compatibility of the SPE and Li-metal anode was identified by Li symmetric cycling  
6 testing. The SPE showed stable cycling with Li metal, indicating that it is compatible with a  
7 Li-metal anode.

1 **Supplementary Note 2. Calculation of electrode porosity of composite cathode**

2 **Equation (5):**

3

$$\text{Electrode porosity} = \frac{1 - \text{electrode density}}{\frac{Wt_{AM+SE}}{\left(\frac{Wt_{AM}}{\text{true density}_{AM}}\right) + \left(\frac{Wt_{SE}}{\text{true density}_{SE}}\right)}} \times 100$$

4 Here, the electrode porosity is the volumetric porosity of the electrode [vol%], and the  
5 *electrode density* is the apparent density of the electrode [ $\text{g cm}^{-3}$ ],  $Wt_{AM+SE}$  is the total  
6 weight fraction of the AM and SE [wt%],  $Wt_{AM}$  is the weight fraction of the AM [wt%],  
7  $Wt_{SE}$  is the weight fraction of the SE [wt%], *true density<sub>AM</sub>* is the true density of the AM  
8 [ $\text{g cm}^{-3}$ ], and *true density<sub>SE</sub>* is the true density of the SE [ $\text{g cm}^{-3}$ ].

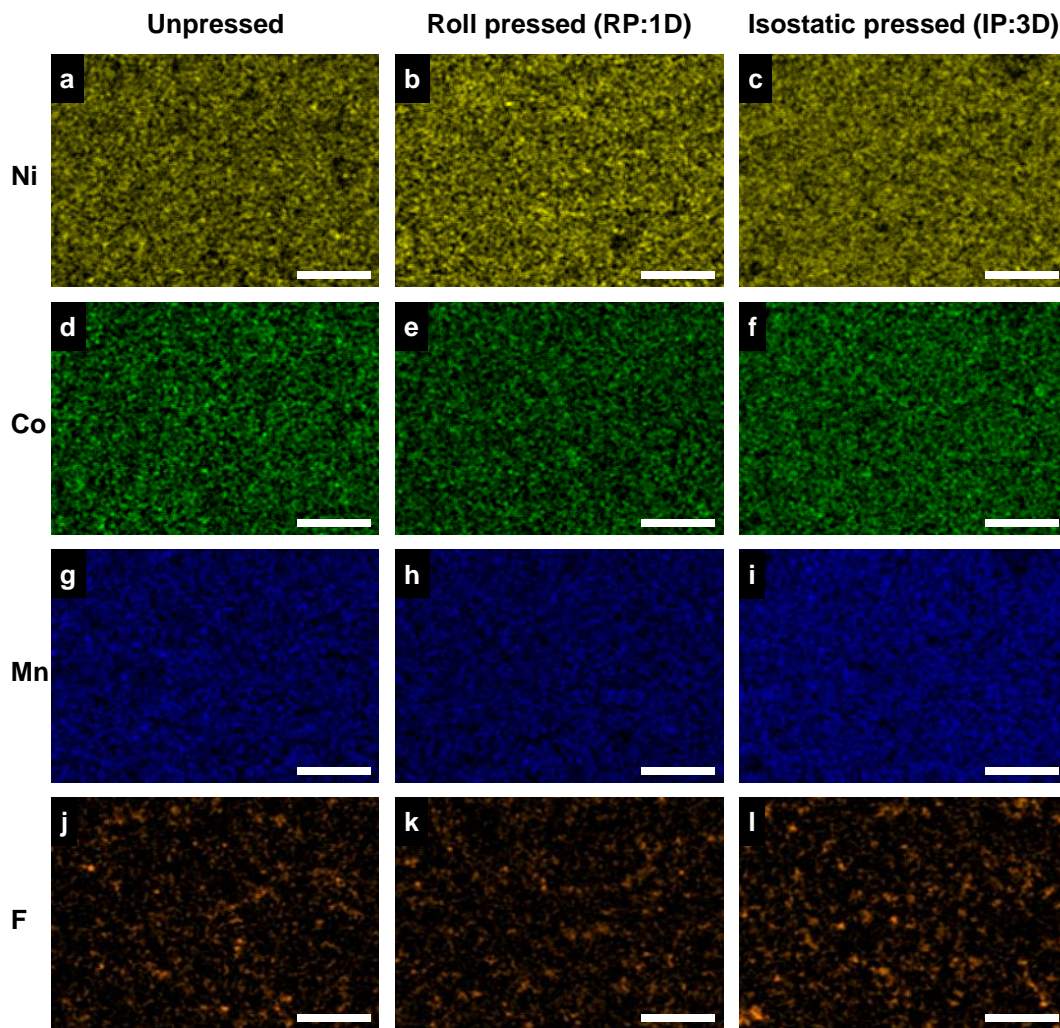

1

2 **Supplementary Fig. 4:** EDS data of cathodes prepared using different pressing methods (**a**,  
 3 unpressed, **b**, roll-pressed, and **c**, isostatic-pressed methods. The scale bars are 100  $\mu\text{m}$ .).

4

5 The EDS analysis focused on Ni, Co, Mn, and F atoms because NCM622 consists of Ni, Co,  
 6 and Mn atoms, and PVDF-HFP in the binder consists of F atoms. The Ni, Co, Mn, and F atoms  
 7 were uniformly distributed in the cathode, demonstrating the cathode uniformity.

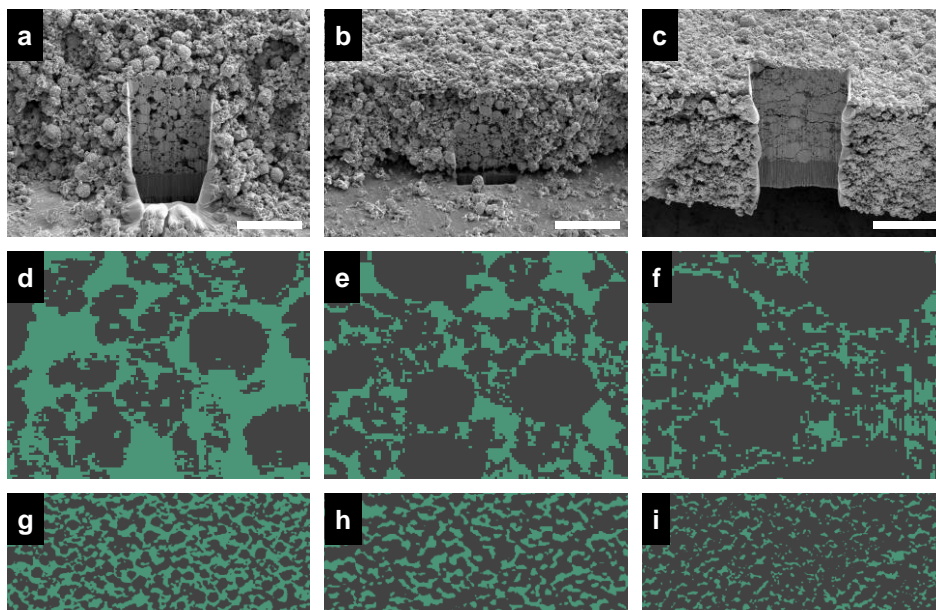

1

2 **Supplementary Fig. 5: 3D and 2D FIB and X-ray CT images of the cathodes prepared**  
 3 **using different pressing methods**

4 3D view of FIB image of cathodes prepared using (a) unpressed, (b) roll-pressed, and (c)  
 5 isostatic-pressed methods. 2D FIB images of cathodes prepared using (d) unpressed, (e) roll-  
 6 pressed, and (f) isostatic-pressed methods (the green and black colors indicate voids and AM,  
 7 respectively.). 2D X-ray CT image of cathodes prepared using (g) unpressed, (h) roll-pressed,  
 8 and (i) isostatic-pressed methods (the green and black colors indicate voids and AM,  
 9 respectively. The scale bars are 50  $\mu\text{m}$ .).

10

11 In the FIB results, the cathode prepared using the WIP method also showed the lowest  
 12 electrode porosity with reduced voids. Moreover, according to the X-ray CT analysis of the  
 13 cathodes prepared using different compressing methods, the cathode prepared using the WIP  
 14 method showed the lowest electrode porosity and highest electrode density. In summary, the  
 15 WIP method is efficient for preparing ideal cathodes with low electrode porosity and high  
 16 electrode density, leading to the formation of uniform and desirable interfacial contact with  
 17 lowered resistance of the electrode.

1 **Supplementary Note 3. Calculation of the cathode IR drop of SSBs**

2 **Equation (6):**

3 
$$\text{IR drop} = Q_{AM,sp} \times \frac{\text{cathode loading thickness}}{2 \times r_{AM,sp}} \times ASR \times \frac{\text{cathode loading thickness}}{2 \times r_{AM,sp}} \times C - \text{rate}$$

4 Here, IR drop is the voltage drop [mV];  $Q_{AM,sp}$  is the areal specific capacity of a single  
5 particle of AM [mAh cm<sup>-2</sup>], which can be calculated using **Equation (13)**; the  
6 *cathode loading thickness* [cm] can be calculated by dividing the areal cathode loading by  
7 the electrode density;  $r_{AM,sp}$  is the radius of a single particle of AM [cm]; *ASR* is the areal  
8 specific resistance of the composite [Ohm cm<sup>2</sup>], which can be calculated using **Equation (1)**;  
9 and *C – rate* is the rate at which the battery is providing energy [C = 1/h].

10

11 **Equation (7):**

12 
$$Q_{AM,sp} = \frac{Q_{AM} \times \text{true density}_{AM} \times V_{AM,sp}}{A_{composite}}$$

13 Here,  $Q_{AM,sp}$  is the areal specific capacity of a single particle of AM [mAh cm<sup>-2</sup>];  $Q_{AM}$  is  
14 the specific capacity of the AM [mAh g<sup>-1</sup>]; *true density<sub>AM</sub>* is the material true density of  
15 the AM [g cm<sup>-3</sup>];  $V_{AM,sp}$  is the volume of a single particle of AM [cm<sup>3</sup>], which can be  
16 calculated by **Equation (14)**; and  $A_{composite}$  is the area of the composite consisting of the  
17 AM and SE [cm<sup>2</sup>], which can be calculated using **Equation (15)**.

18

19 **Equation (8):**

20 
$$V_{AM,sp} = \frac{4}{3} \pi \times (r_{AM,sp})^3$$

21

22 **Equation (9):**

23 
$$A_{composite} = \pi \times (r_{AM,sp} + t_{squeezed SE})^2$$

1 Here,  $t_{squeized SE}$  is the squized thickness of SE [cm].

2

3 **Equation (10):**

4 
$$ASR = \ln \left( \frac{(r_{AM} + t_{squeized SE}) + r_{AM}}{(r_{AM} + t_{squeized SE}) - r_{AM}} \right) / (4 \times t_{squeized SE} \times \sigma_{SE}) \times (r_{AM} + t_{squeized SE})^2$$

5 Here,  $\sigma_{SE}$  is the ionic conductivity of the SE [S/cm].

#### Supplementary Note 4. Calculation of electrode energy density of SSBs

To calculate the electrode energy density considering only the cathode side, which consists of the cathode and Al current collector, **Equation (11)** was used.

##### **Equation (11):**

$$\text{Energy density}_{\text{Electrode}} = \frac{2 \times \text{Discharging capacity}_{\text{AM}} \times Wt_{\text{AM}} \times \text{Areal total loading}_{\text{cathode}} \times \text{Cell voltage}}{\left(2 \times \text{Areal total loading}_{\text{cathode}} + \left(\frac{\rho_{\text{Al}} \times t_{\text{Al}}}{10}\right)\right)}$$

Here,  $\text{Energy density}_{\text{Electrode}}$  is the energy density of the electrode [Wh kg<sup>-1</sup>];  $\text{Discharging capacity}_{\text{AM}}$  is the discharging capacity of the AM [Ah kg<sup>-1</sup>];  $Wt_{\text{AM}}$  is the weight ratio of the AM [wt%];  $\text{Areal total loading}_{\text{cathode}}$  is the areal total loading of the cathode [kg cm<sup>-2</sup>], which can be calculated by multiplying the cathode loading thickness by the electrode density;  $\rho_{\text{Al}}$  is the density of the Al current collector [kg cm<sup>-3</sup>]; and  $t_{\text{Al}}$  is the thickness of the Al current collector [cm].

To calculate the electrode energy density considering both the cathode and anode sides using graphite as the anode material, **Equation (12)** and **Equation (13)** were used.

##### **Equation (12):**

$$\text{Energy density}_{\text{Electrode}} = \frac{2 \times \text{Discharging capacity}_{\text{AM}} \times Wt_{\text{AM}} \times \text{Areal total loading}_{\text{cathode}} \times \text{Cell voltage}}{\left(2 \times \text{Areal total loading}_{\text{cathode}} + \left(\frac{\rho_{\text{Al}} \times t_{\text{Al}}}{10}\right)\right) + \left(2 \times \text{Areal total loading}_{\text{graphite}} + \left(\frac{\rho_{\text{Cu}} \times t_{\text{Cu}}}{10}\right)\right)}$$

Here,  $\text{Areal total loading}_{\text{graphite}}$  is the areal total loading of graphite [kg cm<sup>-2</sup>], which can be calculated using **Equation (13)**;  $\rho_{\text{Cu}}$  is the density of the Cu current collector [kg cm<sup>-3</sup>]; and  $t_{\text{Cu}}$  is the thickness of the Cu current collector [cm].

1 **Equation (13):**

2 
$$\text{Areal total loading}_{\text{graphite}} = \frac{\text{Discharging capacity}_{\text{AM}}}{\text{Discharging capacity}_{\text{graphite}}} \times \frac{N}{P} \text{ratio} \times \text{Areal total loading}_{\text{cathode}}$$

3 Here,  $\text{Discharging capacity}_{\text{AM}}$  is the discharging capacity of the AM [Ah kg<sup>-1</sup>],  
4  $\text{Discharging capacity}_{\text{graphite}}$  is the discharging capacity of graphite [Ah kg<sup>-1</sup>], and N/P  
5 ratio is the areal capacity ratio of the negative to positive electrode.

6

7 To calculate the electrode energy density considering both the cathode and anode sides  
8 using Li metal instead of graphite as the anode material, **Equation (14)** was used.

9

10 **Equation (14):**

11 
$$\text{Energy density}_{\text{Electrode}}$$
  
12 
$$= \frac{2 \times \text{Discharging capacity}_{\text{AM}} \times Wt_{\text{AM}} \times \text{Areal total loading}_{\text{cathode}} \times \text{Cell voltage}}{\left(2 \times \text{Areal total loading}_{\text{cathode}} + \left(\frac{\rho_{\text{Al}} \times t_{\text{Al}}}{10}\right)\right) + \left(2 \times \text{Areal total loading}_{\text{Li}} + \left(\frac{\rho_{\text{Cu}} \times t_{\text{Cu}}}{10}\right)\right)}$$

13 Here,  $\text{Areal total loading}_{\text{Li}}$  is the areal total loading of Li [kg cm<sup>-2</sup>].

14

15 To calculate the electrode energy density considering both the cathode and anode sides  
16 using Li metal as the anode material except with a Cu current collector, **Equation (15)** was  
17 used.

18

19 **Equation (15):**

20 
$$\text{Energy density}_{\text{Electrode}} = \frac{2 \times \text{Discharging capacity}_{\text{AM}} \times Wt_{\text{AM}} \times \text{Areal total loading}_{\text{cathode}} \times \text{Cell voltage}}{\left(2 \times \text{Areal total loading}_{\text{cathode}} + \left(\frac{\rho_{\text{Al}} \times t_{\text{Al}}}{10}\right)\right) + (2 \times \text{Areal total loading}_{\text{Li}})}$$

21

1 **Supplementary Note 5. Calculation of energy density considering the electrode and SE of**  
2 **SSBs**

3 To calculate the electrode energy density considering the electrode and SE, **Equation (16)**  
4 was used.

6 **Equation (16):**

7 *Energy density*<sub>Electrode+SE</sub>

8 
$$= \frac{2 \times \text{Discharging capacity}_{AM} \times Wt_{AM} \times \text{Areal total loading}_{cathode} \times \text{Cell voltage}}{\left(2 \times \text{Areal total loading}_{cathode} + \left(\frac{\rho_{Al} \times t_{Al}}{10}\right)\right) + \left(2 \times \text{Areal total loading}_{Li} + \left(\frac{\rho_{Cu} \times t_{Cu}}{10}\right)\right) + \left(2 \times \left(\frac{\rho_{SE} \times t_{SE}}{10}\right)\right)}$$

9 Here, *Energy density*<sub>Electrode+SE</sub> is the energy density of the electrode and SE [Wh kg<sup>-1</sup>];  
10 *Discharging capacity*<sub>AM</sub> is the discharging capacity of the AM [Ah kg<sup>-1</sup>]; *Wt*<sub>AM</sub> is the  
11 weight ratio of the AM [wt%]; *Areal total loading*<sub>cathode</sub> is the areal total loading of the  
12 cathode [kg cm<sup>-2</sup>]; *Areal total loading*<sub>Li</sub> is the areal total loading of Li [kg cm<sup>-2</sup>];  
13 *Cell voltage* is the nominal voltage [V];  $\rho_{Al}$  is the density of the Al current collector [kg  
14 cm<sup>-3</sup>];  $t_{Al}$  is the thickness of the Al current collector [cm];  $\rho_{Cu}$  is the density of the Cu  
15 current collector [kg cm<sup>-3</sup>];  $t_{Cu}$  is the thickness of the Cu current collector [cm];  $\rho_{SE}$  is the  
16 density of the SE membrane [kg cm<sup>-3</sup>]; and  $t_{SE}$  is the thickness of the SE membrane [cm].

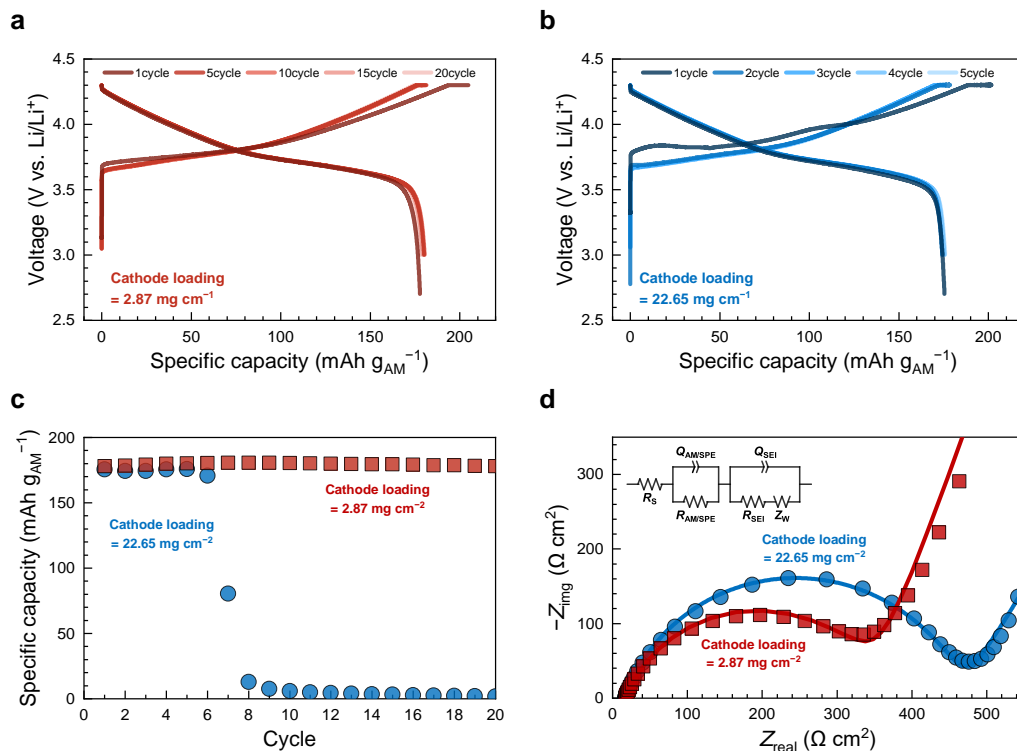

1

## 2 **Supplementary Fig. 7: Coin-cell performance of SSBs based on SPE**

3 **a**, Charge–discharge curves of Li/SPE/NCM622 coin cell with low cathode loading (3.50 mg  
 4 cm<sup>-2</sup>). **b**, Charge–discharge curves of Li/SPE/NCM622 coin cell with high cathode loading  
 5 (22.67 mg cm<sup>-2</sup>). **c**, Discharging capacity during cycling of Li/SPE/NCM622 coin cells with  
 6 different cathode loading levels. **d**, EIS results of Li/SPE/NCM622 coin cells with different  
 7 cathode loading levels.

8

9 To evaluate the cell performance of SSBs using the developed SPE and freestanding Li-  
 10 metal anode design, coin-cell tests were performed to examine the effect of the areal cathode  
 11 loading on the cell performance. The weight ratio of AM was 94 wt%, and the C-rate was 0.1  
 12 C for all the coin-cell tests. One coin cell had a low cathode loading of 3.50 mg cm<sup>-2</sup>, and the  
 13 other had a high cathode loading of 22.67 mg cm<sup>-2</sup>.

14 The results of the cycling test indicated that the areal discharging capacity was 179.2 mAh  
 15 g<sub>AM</sub><sup>-1</sup> with the low areal cathode loading and 174.4 mAh g<sub>AM</sub><sup>-1</sup> with the high areal cathode

1 loading, which are similar values. However, the discharging capacity and energy increased  
2 from 0.791 mAh and 3.01 mWh with the low areal cathode loading to 6.081 mAh and 23.18  
3 mWh with the high areal cathode loading. This result indicates that a high areal cathode loading  
4 is necessary for producing high capacity and energy output of the SSBs.

5 The coulombic efficiency was similar for the low areal cathode loading (99.25%) and high  
6 areal cathode loading (99.20%). However, the energy efficiency was lower for the coin cell  
7 with high areal cathode loading (96.70%) than for that with the low areal cathode loading  
8 (99.25%). This result suggests a trade-off between the energy and energy efficiency depending  
9 on the areal cathode loading. The higher cathode IR drop with higher areal cathode loading  
10 results in low energy efficiency.

11 Capacity retention is also an essential parameter in cell performance. The coin cell exhibited  
12 stable capacity retention when using low areal cathode loading during 20 cycles. However,  
13 sudden capacity fading was observed after the 7<sup>th</sup> cycle for the coin cell using high areal  
14 cathode loading. This result indicates that a high areal cathode loading induces a high IR drop,  
15 leading to the high resistance of the cell and capacity decay. The resistance of the cell before  
16 and after full-cell cycling was measured using EIS, and it increased as expected in calculating  
17 the cathode IR drop tendency depending on the areal cathode loading. In summary, both the  
18 anode and SPE showed good stability during cycling, and the capacity decay may stem from  
19 the increased resistance of the cell due to the high cathode IR drop when using high areal  
20 cathode loading.

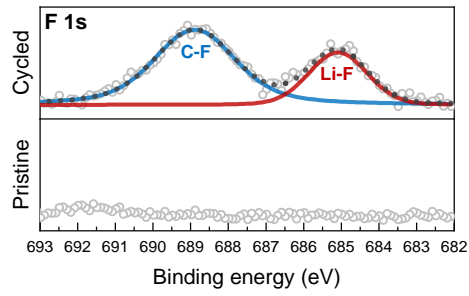

1

2 **Supplementary Fig. 8:** XPS data of Li-metal anode after full-cell cycling of Li/SPE/NCM622  
3 coin cell.

4

5 After the full-cell cycling of the coin cell, XPS data of the Li-metal anode side was collected,  
6 and formation of C-F and LiF, stemming from the PVDF-HFP in the SPE, was observed. The  
7 LiF formed the stable layer on the Li-metal anode<sup>S2</sup>.

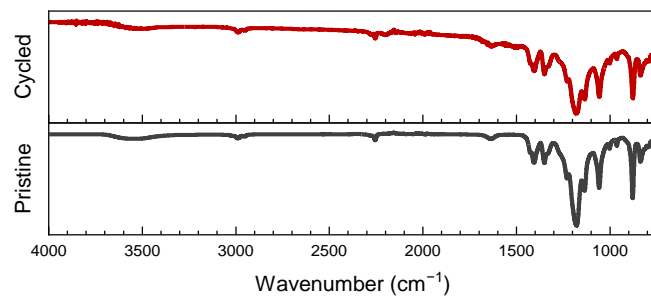

1

2 **Supplementary Fig. 9:** FTIR data of SPE before and after full-cell cycling of Li/SPE/NCM622  
3 coin cell.

4

5 FTIR spectra of the SPE before and after full-cell cycling were analyzed and indicated no  
6 structural change during cycling.

1 **Supplementary Table 1.** Parameters for SSB pouch cell targeting energy density of 200 Wh  
 2 kg<sup>-1</sup>.

| <b>Electrode</b>                                      | <b>Li</b> | <b>NCM622</b>                 | <b>Electrolyte</b>        | <b>N/A</b>                       |
|-------------------------------------------------------|-----------|-------------------------------|---------------------------|----------------------------------|
| Layers                                                | 6         | 4                             | True density              | 0.00 g cm <sup>-3</sup>          |
| Active materials capacity<br>(charge, single-side)    | -         | 207.74 mAh g <sup>-1</sup>    | Excess ratio              | 0.00 vol%                        |
|                                                       | -         | 3.69 mAh cm <sup>-2</sup>     | E/C ratio                 | 0.00 g Ah <sup>-1</sup>          |
| Active materials capacity<br>(discharge, single-side) | 3860      | 187.14 mAh g <sup>-1</sup>    | Volume                    | 0.00 cm <sup>3</sup>             |
|                                                       | 4.12      | 3.32 mAh cm <sup>-2</sup>     | Weight                    | 0.00 g                           |
| N/P (discharge)                                       |           | 2.35                          | <b>Separator</b>          | <b>SPE</b>                       |
| Initial coulombic efficiency                          |           | 90.08 %                       | True density              | 1.80 g cm <sup>-3</sup>          |
| Nominal discharge voltage                             | 0.00      | 3.81 V vs. Li/Li <sup>+</sup> | Pore volume               | 0.00 cm <sup>3</sup>             |
| Active materials ratio                                | 100.00    | 93.00 wt%                     | Porosity                  | 0.00 vol%                        |
| Solid electrolyte ratio                               | 0.00      | 5.00 wt%                      | Thickness                 | 82.00 μm                         |
| Binder ratio                                          | 0.00      | 0.00 wt%                      | Width                     | 3.40 cm                          |
| Conductive agent ratio                                | 0.00      | 2.00 wt%                      | Height                    | 4.55 cm                          |
| Areal total loading weight                            | 1.07      | 19.09 mg cm <sup>-2</sup>     | Area                      | 15.47 cm <sup>2</sup>            |
| Spatial total loading density                         | 0.53      | 3.70 g cm <sup>-3</sup>       | Volume                    | 0.13 cm <sup>3</sup>             |
| True total loading density                            | 0.53      | 4.28 g cm <sup>-3</sup>       | Weight                    | 0.23 g                           |
| Pore volume                                           | 0.00      | 0.01 cm <sup>3</sup>          | <b>Package</b>            | <b>Al pouch</b>                  |
| Porosity                                              | 0.00      | 13.64 vol%                    | Areal weight              | 180.00 g m <sup>-2</sup>         |
| Thickness                                             | 20.00     | 51.59 μm                      | Thickness                 | 110.00 μm                        |
| Width                                                 | 3.00      | 2.90 cm                       | Width                     | 3.90 cm                          |
| Height                                                | 4.15      | 4.05 cm                       | Height                    | 5.45 cm                          |
| Area                                                  | 12.45     | 11.75 cm <sup>2</sup>         | Area                      | 21.26 cm <sup>2</sup>            |
| Volume                                                | 0.02      | 0.06 cm <sup>3</sup>          | Volume                    | 0.23 cm <sup>3</sup>             |
| Weight                                                | 0.01      | 0.22 g                        | Weight                    | 0.38 g                           |
| <b>Current collector</b>                              | <b>Cu</b> | <b>Al</b>                     | <b>Cell dimension</b>     |                                  |
| Layers                                                | 3         | 2                             | Parallel stack            | 4 unit cell                      |
| True density                                          | 8.96      | 2.70 g cm <sup>-3</sup>       | Nominal discharge voltage | 3.81 V                           |
| Thickness                                             | 0.00      | 20.00 μm                      | Discharge capacity        | 156.08 mAh                       |
| Width                                                 | 3.00      | 2.90 cm                       | Width                     | 3.90 cm                          |
| Height                                                | 4.15      | 4.05 cm                       | Height                    | 5.45 cm                          |
| Area (+ tab)                                          | 0.40      | 12.15 cm <sup>2</sup>         | Thickness                 | 0.87 mm                          |
| Volume                                                | 0.00      | 0.02 cm <sup>3</sup>          | Volume                    | 1.43 cm <sup>3</sup>             |
| Weight                                                | 0.00      | 0.07 g                        | Weight                    | 2.92 g                           |
| <b>Lead tab</b>                                       | <b>Ni</b> | <b>Al</b>                     | <b>Energy density</b>     | <b>203.64 Wh kg<sup>-1</sup></b> |
| Weight                                                | 98.30     | 36.90 mg                      |                           | <b>416.09 Wh L<sup>-1</sup></b>  |

3

1 **Supplementary Table 2.** Parameters for SSB pouch cell targeting energy density of 280 Wh  
 2 kg<sup>-1</sup>.

| <b>Electrode</b>                                      | <b>Li</b> | <b>NCM622</b>                 | <b>Electrolyte</b>        | <b>N/A</b>                       |
|-------------------------------------------------------|-----------|-------------------------------|---------------------------|----------------------------------|
| Layers                                                | 22        | 20                            | True density              | 0.00 g cm <sup>-3</sup>          |
| Active materials capacity<br>(charge, single-side)    | -         | 195.33 mAh g <sup>-1</sup>    | Excess ratio              | 0.00 vol%                        |
|                                                       | -         | 4.82 mAh cm <sup>-2</sup>     | E/C ratio                 | 0.00 g Ah <sup>-1</sup>          |
| Active materials capacity<br>(discharge, single-side) | 3860      | 173.16 mAh g <sup>-1</sup>    | Volume                    | 0.00 cm <sup>3</sup>             |
|                                                       | 4.12      | 4.27 mAh cm <sup>-2</sup>     | Weight                    | 0.00 g                           |
| N/P (discharge)                                       |           | 2.09                          | <b>Separator</b>          | <b>SPE</b>                       |
| Initial coulombic efficiency                          |           | 88.65 %                       | True density              | 1.80 g cm <sup>-3</sup>          |
| Nominal discharge voltage                             | 0.00      | 3.75 V vs. Li/Li <sup>+</sup> | Pore volume               | 0.00 cm <sup>3</sup>             |
| Active materials ratio                                | 100.00    | 94.00 wt%                     | Porosity                  | 0.00 vol%                        |
| Solid electrolyte ratio                               | 0.00      | 4.00 wt%                      | Thickness                 | 96.00 μm                         |
| Binder ratio                                          | 0.00      | 0.00 wt%                      | Width                     | 3.40 cm                          |
| Conductive agent ratio                                | 0.00      | 2.00 wt%                      | Height                    | 4.55 cm                          |
| Areal total loading weight                            | 1.07      | 26.23 mg cm <sup>-2</sup>     | Area                      | 15.47 cm <sup>2</sup>            |
| Spatial total loading density                         | 0.53      | 3.70 g cm <sup>-3</sup>       | Volume                    | 0.15 cm <sup>3</sup>             |
| True total loading density                            | 0.53      | 4.35 g cm <sup>-3</sup>       | Weight                    | 0.27 g                           |
| Pore volume                                           | 0.00      | 0.01 cm <sup>3</sup>          | <b>Package</b>            | <b>Al pouch</b>                  |
| Porosity                                              | 0.00      | 14.92 vol%                    | Areal weight              | 180.00 g m <sup>-2</sup>         |
| Thickness                                             | 20.00     | 70.90 μm                      | Thickness                 | 110.00 μm                        |
| Width                                                 | 3.00      | 2.90 cm                       | Width                     | 3.90 cm                          |
| Height                                                | 4.15      | 4.05 cm                       | Height                    | 5.45 cm                          |
| Area                                                  | 12.45     | 11.75 cm <sup>2</sup>         | Area                      | 21.26 cm <sup>2</sup>            |
| Volume                                                | 0.02      | 0.08 cm <sup>3</sup>          | Volume                    | 0.23 cm <sup>3</sup>             |
| Weight                                                | 0.01      | 0.31 g                        | Weight                    | 0.38 g                           |
| <b>Current collector</b>                              | <b>Cu</b> | <b>Al</b>                     | <b>Cell dimension</b>     |                                  |
| Layers                                                | 11        | 10                            | Parallel stack            | 20 unit cell                     |
| True density                                          | 8.96      | 2.70 g cm <sup>-3</sup>       | Nominal discharge voltage | 3.75 V                           |
| Thickness                                             | 0.00      | 20.00 μm                      | Discharge capacity        | 1002.93 mAh                      |
| Width                                                 | 3.00      | 2.90 cm                       | Width                     | 3.90 cm                          |
| Height                                                | 4.15      | 4.05 cm                       | Height                    | 5.45 cm                          |
| Area (+ tab)                                          | 0.40      | 12.15 cm <sup>2</sup>         | Thickness                 | 4.16 mm                          |
| Volume                                                | 0.00      | 0.02 cm <sup>3</sup>          | Volume                    | 6.25 cm <sup>3</sup>             |
| Weight                                                | 0.00      | 0.07 g                        | Weight                    | 13.38 g                          |
| <b>Lead tab</b>                                       | <b>Ni</b> | <b>Al</b>                     | <b>Energy density</b>     | <b>281.19 Wh kg<sup>-1</sup></b> |
| Weight                                                | 98.30     | 36.90 mg                      |                           | <b>602.06 Wh L<sup>-1</sup></b>  |

### TEST REPORT

|                     |                                                                                                                                                          |                                                        |
|---------------------|----------------------------------------------------------------------------------------------------------------------------------------------------------|--------------------------------------------------------|
| <br><b>신리성시험평가원</b> | <b>RTL Co., Ltd.</b><br>49 Techno-daero 4-gil, Hyeonpung-eup,<br>Dalseong-gun, Daegu, Republic of Korea<br>Tel : +82-53-615-5607 / Fax : +82-53-615-5608 | Report No :<br><b>TR-22-023</b><br>Page 1 1/(Total 5 ) |
|---------------------|----------------------------------------------------------------------------------------------------------------------------------------------------------|--------------------------------------------------------|

1. Client  
 Company name : Korea Institute of Energy Research  
 Address : 152 Gajeong-ro, Yuseong-gu, Daejeon, Republic of Korea

2. Test Sample  
 Product name : KIER solid state battery pouch cell  
 Model name : KIER-SSB0-01  
 Manufacturer : Korea Institute of Energy Research

3. Date of Test : 2022. 08. 04 ~ 2022. 08. 06

4. Test Method : Procedure for the client's requirements

5. Testing Environment : Temperature (20 ± 5) °C

6. Test Results : Attachment Test Results Report

|                            |                                        |
|----------------------------|----------------------------------------|
| Tested by                  | Approved by                            |
| Confirm Name : Geon-Ho Lee | Technical Manager Name : Hyung-Dal Kim |

1. This test report does not guarantee the quality and performance of the entire product as a result of evaluating only the test product provided by the applicant.  
 2. You may not copy or use all or part of this transcript without prior approval from our company.  
 3. This report is not related to KS Q ISO/IEC 17025 and KOLAS certification.

2022. 08. 12

President of RTL Co., Ltd. CEO

\* If you need to check the authenticity of the test report, contact the contact information on the top.

RTL-QP-15-07(2022.01.03)

Report No : TR-22-023 Page ( 2 ) / (Total 5 )

### Test Result

○ Contents

| ITEM                                  | Page No. |
|---------------------------------------|----------|
| Test equipment, Sample specifications | 2        |
| Test procedure, Test result           | 3        |
| Sample photos                         | 4        |
| Test_graph (test profile graph)       | 5        |

○ Test equipment

| Item                                              | Manufacturer | Model name           | Calibration date |
|---------------------------------------------------|--------------|----------------------|------------------|
| ADVANCED BATTERY EQUIPMENT (5 V, 500 mA)          | CHEN TECH    | MCF Life-508500500mA | 2021. 09. 27     |
| PROGRAMMABLE TEMPERATURE & HUMIDITY CONTROLLER #4 | KWANG MYONG  | KM3-1                | 2021. 12. 07     |

○ Sample specifications

| Item           | Applicant Submission Specifications |
|----------------|-------------------------------------|
| Sample type    | KIER solid state battery pouch cell |
| Manufacturer   | Korea Institute of Energy Research  |
| Product name   | KIER-SSB0-01                        |
| Normal voltage | 3.75 V                              |
| Rated capacity | 1,002.93 mAh                        |

RTL-QP-15-08(2020.04.01)

Report No : TR-22-023 Page ( 3 ) / (Total 5 )

○ Test procedure and result  
 Energy density per unit weight

| Sample name  | Test methods                                                                                                                                                                                                                                                                                                                                                                                                                                                                                                                         |
|--------------|--------------------------------------------------------------------------------------------------------------------------------------------------------------------------------------------------------------------------------------------------------------------------------------------------------------------------------------------------------------------------------------------------------------------------------------------------------------------------------------------------------------------------------------|
| KIER-SSB0-01 | 1) Put the sample in the chamber, set the temperature to (45 ± 2) °C, and when the set temperature is reached, rest for 2 hours.<br>2) Charging to 4.3 V with a current of 0.05 C, and charging is terminated when the current value is 0.01 C.<br>3) Take a 10-minute rest.<br>4) Discharge to 2.7 V with a current of 0.05 C.<br>5) After the discharge is completed, the discharge capacity and the average discharge voltage are checked to calculate the energy density per unit weight using an energy density model equation. |

| Sample name  | Weight (kg) | Discharge capacity (Ah) | Average discharge voltage (V) | Energy density per unit weight (Wh/kg) |
|--------------|-------------|-------------------------|-------------------------------|----------------------------------------|
| KIER-SSB0-01 | 0.013 378   | 0.949 393               | 3.740 655                     | 265.462 102                            |

\* Sample weight: Apply the result value provided by the Korea Institute of Energy Research.  
 \* The energy density is calculated by the following equation.

- Average discharge voltage

$$V_{avr} = \frac{V_1 + V_2 + \dots + V_n}{n}$$

$V_{avr}$  : Average discharge voltage  
 $n$  : The number of voltage measurements  
 $V_1 + V_2 + \dots + V_n$  : Voltage values recorded at  $n$  intervals

- Unit cell / Module energy

$$W_{ed} = C_d V_{avr}$$

$W_{ed}$  : Unit cell / Module energy (Wh)  
 $C_d$  : Discharge capacity (Ah)  
 $V_{avr}$  : Average discharge voltage

- Energy density per unit weight

$$\rho_{ed} = \frac{W_{ed}}{m}$$

$\rho_{ed}$  : Energy density per unit weight (Wh/kg)  
 $W_{ed}$  : Unit cell / Module energy (Wh)  
 $m$  : Weight (kg)

RTL-QP-15-08(2020.04.01)

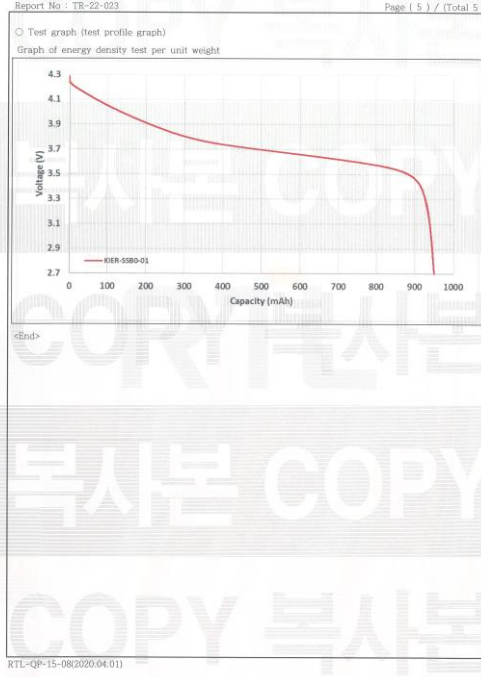

1

2 **Supplementary Fig. 6: Certification of energy density of ~280 Wh kg<sup>-1</sup> from the second cycle**

3 **by external third-party organization**

1 **Supplementary Table 3.** Comparison of pouch-cell performance of SSB between this work  
 2 and other references.

| Ref                                                | AM content<br>mg cm <sup>-2</sup> | AM ratio<br>wt% | SE ratio<br>wt% | CA ratio<br>wt% | Binder ratio<br>wt% | Cathode loading weight<br>mg cm <sup>-2</sup> | SE loading weight<br>mg cm <sup>-2</sup> | Anode loading weight<br>mg cm <sup>-2</sup> | Total cell loading weight<br>mg cm <sup>-2</sup> | Specific discharge capacity<br>mAh g <sup>-1</sup> | Nominal discharge voltage<br>V | Areal discharge capacity<br>mAh cm <sup>-2</sup> | Gravimetric energy density<br>Wh kg <sup>-1</sup> |        |
|----------------------------------------------------|-----------------------------------|-----------------|-----------------|-----------------|---------------------|-----------------------------------------------|------------------------------------------|---------------------------------------------|--------------------------------------------------|----------------------------------------------------|--------------------------------|--------------------------------------------------|---------------------------------------------------|--------|
| J. Electrochem. Soc. 161, A1812–A1817 (2014)       | R13                               | 5.15            | 68.6            | 29.4            | 2.0                 | 0.0                                           | 7.50                                     | 151.00                                      | 5.30                                             | 163.80                                             | 125.0                          | 3.59                                             | 0.64                                              | 14.10  |
| ACS Appl. Mater. Interfaces 10, 2556–2565 (2018)   | R14                               | 6.23            | 70.0            | 30.0            | 0.0                 | 0.0                                           | 8.90                                     | 127.40                                      | 4.30                                             | 140.60                                             | 131.0                          | 3.76                                             | 0.82                                              | 21.83  |
| J. Electrochem. Soc. 159, A1120–A1124 (2012)       | R15                               | 3.77            | 37.7            | 56.6            | 5.7                 | 0.0                                           | 10.00                                    | 200.00                                      | 39.00                                            | 249.00                                             | 120.0                          | 3.85                                             | 0.45                                              | 6.99   |
| J. Power Sources 389, 140–147 (2018)               | R16                               | 5.89            | 78.5            | 21.5            | 0.0                 | 0.0                                           | 7.50                                     | 150.70                                      | 29.40                                            | 187.60                                             | 130.0                          | 3.92                                             | 0.77                                              | 15.99  |
| Solid State Ionics 296, 13–17 (2016)               | R17                               | 1.38            | 60.0            | 35.0            | 5.0                 | 0.0                                           | 2.30                                     | 90.40                                       | 3.00                                             | 95.70                                              | 100.0                          | 3.28                                             | 0.14                                              | 4.73   |
| ACS Appl. Mater. Interfaces 10, 31404–31412 (2018) | R18                               | 7.00            | 70.0            | 25.0            | 2.5                 | 2.5                                           | 10.00                                    | 90.40                                       | 5.30                                             | 105.70                                             | 168.0                          | 3.7                                              | 1.18                                              | 41.17  |
| J. Power Sources 375, 93–101 (2018)                | S3                                | 29.30           | 79.2            | 19.5            | 1.3                 | 0.0                                           | 37.00                                    | 7.50                                        | 27.00                                            | 71.50                                              | 120.0                          | 3.57                                             | 3.52                                              | 175.58 |
| J. Power Sources 375, 93–101 (2018)                | S3                                | 14.30           | 68.1            | 29.2            | 1.3                 | 1.4                                           | 21.00                                    | 4.90                                        | 13.00                                            | 38.90                                              | 110.0                          | 3.67                                             | 1.57                                              | 148.41 |
| Sci. Rep. 8, 1212 (2018)                           | S4                                | 15.93           | 76.2            | 19.0            | 1.9                 | 2.9                                           | 20.90                                    | 13.90                                       | 21.50                                            | 56.30                                              | 122.0                          | 3.51                                             | 1.94                                              | 121.13 |
| J. Electrochem. Soc. 164, A2474–A2478 (2017)       | R19                               | 9.50            | 66.0            | 28.3            | 2.8                 | 2.8                                           | 14.40                                    | 11.30                                       | 10.20                                            | 35.90                                              | 111.0                          | 3.62                                             | 1.05                                              | 106.38 |
| Nat. Energy 1, 16030 (2016)                        | R20                               | 4.86            | 60.0            | 34.0            | 6.0                 | 0.0                                           | 8.10                                     | 49.80                                       | 6.00                                             | 63.90                                              | 110.0                          | 3.71                                             | 0.53                                              | 31.04  |
| J. Phys. Chem. Lett. 9, 607–613 (2018)             | S5                                | 115.29          | 61.0            | 36.0            | 3.0                 | 0.0                                           | 189.00                                   | 18.00                                       | 112.00                                           | 319.00                                             | 123.0                          | 3.75                                             | 14.18                                             | 166.70 |
| J. Power Sources 248, 943–950 (2014)               | R21                               | 6.78            | 60.0            | 35.0            | 5.0                 | 0.0                                           | 11.30                                    | 52.70                                       | 11.30                                            | 75.30                                              | 121.0                          | 3.59                                             | 0.82                                              | 39.11  |
| Nano Lett. 17, 3013–3020 (2017)                    | R22                               | 10.01           | 86.3            | 11.0            | 1.8                 | 0.9                                           | 11.60                                    | 134.60                                      | 6.00                                             | 152.20                                             | 119.0                          | 3.69                                             | 1.19                                              | 28.88  |
| J. Am. Chem. Soc. 140, 16330–16339 (2018)          | S6                                | 34.30           | 70.0            | 30.0            | 0.0                 | 0.0                                           | 49.00                                    | 133.00                                      | 81.00                                            | 263.00                                             | 89.0                           | 2.11                                             | 3.05                                              | 24.49  |
| J. Electrochem. Soc. 162, A646–A651 (2015)         | R23                               | 0.60            | 30.0            | 60.0            | 10.0                | 0.0                                           | 2.00                                     | 75.00                                       | 5.00                                             | 82.00                                              | 1640.0                         | 1.94                                             | 0.98                                              | 23.28  |
| Nano Lett. 16, 7148–7154 (2016)                    | R24                               | 3.60            | 40.0            | 50.0            | 10.0                | 0.0                                           | 9.00                                     | 180.00                                      | 5.00                                             | 194.00                                             | 501.0                          | 1.25                                             | 1.80                                              | 11.62  |
| J. Mater. Chem. A 6, 12098–12105 (2018)            | R25                               | 5.72            | 45.0            | 50.0            | 5.0                 | 0.0                                           | 12.70                                    | 191.10                                      | 5.00                                             | 208.80                                             | 550.0                          | 1.45                                             | 3.14                                              | 21.83  |
| ACS Appl. Mater. Interfaces 10, 22264–22277 (2018) | R26                               | 9.90            | 45.0            | 25.0            | 15.0                | 15.0                                          | 22.00                                    | 101.00                                      | 18.00                                            | 141.00                                             | 102.0                          | 1.13                                             | 1.01                                              | 8.09   |
| ACS Appl. Mater. Interfaces 10, 22329–22339 (2018) | R27                               | 7.00            | 50.0            | 50.0            | 0.0                 | 0.0                                           | 14.00                                    | 263.00                                      | 11.00                                            | 288.00                                             | 116.0                          | 3.91                                             | 0.81                                              | 11.02  |
| ACS Appl. Mater. Interfaces 9, 9654–9661 (2017)    | S7                                | 60.75           | 75.0            | 15.0            | 10.0                | 0.0                                           | 81.00                                    | 15.00                                       | 5.00                                             | 101.00                                             | 155.0                          | 3.11                                             | 9.42                                              | 289.95 |
| Solid State Ionics 315, 65–70 (2018)               | R28                               | 6.00            | 60.0            | 30.0            | 10.0                | 0.0                                           | 10.00                                    | 23.00                                       | 11.00                                            | 44.00                                              | 165.0                          | 3.68                                             | 0.99                                              | 82.80  |
| Chem. Mater. 28, 4453–4459 (2016)                  | S8                                | 11.70           | 90.0            | 10.0            | 0.0                 | 0.0                                           | 13.00                                    | 24.00                                       | 5.00                                             | 42.00                                              | 136.0                          | 3.85                                             | 1.59                                              | 145.86 |
| Energy Storage Mater. 18, 31261–31264 (2018)       | R29                               | 7.39            | 67.2            | 28.8            | 2.0                 | 2.0                                           | 11.00                                    | 16.00                                       | 6.00                                             | 33.00                                              | 139.0                          | 3.73                                             | 1.03                                              | 116.14 |
| Nano Lett. 15, 2671–2678 (2015)                    | S9                                | 14.70           | 70.0            | 25.0            | 5.0                 | 0.0                                           | 21.00                                    | 3.00                                        | 2.00                                             | 26.00                                              | 165.0                          | 3.27                                             | 2.43                                              | 305.05 |
| J. Power Sources 364, 191–199 (2017)               | R30                               | 5.20            | 65.0            | 20.0            | 15.0                | 0.0                                           | 8.00                                     | 2.00                                        | 5.00                                             | 15.00                                              | 152.0                          | 3.4                                              | 0.79                                              | 179.16 |
| Nat. Mater. 12, 452–457 (2013)                     | R31                               | 4.80            | 60.0            | 32.0            | 8.0                 | 0.0                                           | 8.00                                     | 8.00                                        | 5.00                                             | 21.00                                              | 162.0                          | 3.38                                             | 0.78                                              | 125.16 |
| Nat. Energy, 5, 299–308 (2020)                     | R7                                | 29.28           | 81.3            | 14.4            | 2.9                 | 1.4                                           | 36.00                                    | 4.62                                        | 0.27                                             | 40.89                                              | 215.0                          | 3.75                                             | 6.30                                              | 577.42 |
| Science, 373, 1494–1499 (2021)                     | S10                               | 21.65           | 77.3            | 19.3            | 2.9                 | 0.5                                           | 28.00                                    | 107.80                                      | 5.00                                             | 140.80                                             | 200.0                          | 3.75                                             | 4.33                                              | 115.30 |
| Nature, 601, 217–222 (2022)                        | S11                               | 10.30           | 70.0            | 10.0            | 10.0                | 10.0                                          | 14.72                                    | 2.55                                        | 1.87                                             | 19.14                                              | 210.0                          | 3.75                                             | 2.16                                              | 423.97 |
| Nat. Energy, 7, 83–93 (2022)                       | R36                               | 47.25           | 90.0            | 10.0            | 0.0                 | 0.0                                           | 52.50                                    | 178.25                                      | 1.35                                             | 232.10                                             | 95.0                           | 3.75                                             | 4.49                                              | 72.52  |
| This work                                          |                                   | 24.66           | 94.0            | 4.0             | 2.0                 | 0.0                                           | 26.23                                    | 17.51                                       | 1.07                                             | 44.81                                              | 173.2                          | 3.75                                             | 4.27                                              | 357.54 |

## 1 **Supplementary references**

- 2 S1. Aliahmad, N., Shrestha, S., Varahramyan, K., & Agarwal, M. Poly (vinylidene fluoride-  
3 hexafluoropropylene) polymer electrolyte for paper-based and flexible battery  
4 applications. *AIP Adv.* **6**, 065206 (2016).
- 5 S2. Park, S., Jeong, S. Y., Lee, T. K., Park, M. W., Lim, H. Y., Sung, J., Cho, J., Kwak, S. K.,  
6 Hong, S. Y. & Choi, N. S. Replacing conventional battery electrolyte additives with  
7 dioxolone derivatives for high-energy-density lithium-ion batteries. *Nat. Commun.* **12**,  
8 838 (2021).
- 9 S3. Nam, Y. J., Oh, D. Y., Jung, S. H. & Jung, Y. S. Toward practical all-solid-state lithium-  
10 ion batteries with high energy density and safety: Comparative study for electrodes  
11 fabricated by dry-and slurry-mixing processes. *J. Power Sources* **375**, 93-101 (2018).
- 12 S4. Yamamoto, M., Terauchi, Y., Sakuda, A. & Takahashi, M. Binder-free sheet-type all-  
13 solid-state batteries with enhanced rate capabilities and high energy densities. *Sci. Rep.* **8**,  
14 1212 (2018).
- 15 S5. Kato, Y., Shiotani, S., Morita, K., Suzuki, K., Hirayama, M. & Kanno, R. All-solid-state  
16 batteries with thick electrode configurations. *J. Phys. Chem. Lett.* **9**, 607-613 (2018).
- 17 S6. Kraft, M. A., Ohno, S., Zinkevich, T., Koerver, R., Culver, S. P., Fuchs, T., Senyshyn, A.,  
18 Indris, S., Morgan, B. J. & Zeier, W. G. Inducing high ionic conductivity in the lithium  
19 superionic argyrodites  $\text{Li}_6\text{+ x P}_{1-x}\text{Ge}_x\text{S}_5\text{I}$  for all-solid-state batteries. *J. Am. Chem.*  
20 *Soc.* **140**, 16330-16339 (2018).
- 21 S7. Chen, R. J., Zhang, Y. B., Liu, T., Xu, B. Q., Lin, Y. H., Nan, C. W. & Shen, Y.  
22 Addressing the interface issues in all-solid-state bulk-type lithium ion battery via an all-

- 1 composite approach. *ACS Energy Lett.* **9**, 9654-9661 (2017).
- 2 S8. Wakayama, H., Yonekura, H. & Kawai, Y. Three-dimensional bicontinuous  
3 nanocomposite from a self-assembled block copolymer for a high-capacity all-solid-state  
4 lithium battery cathode. *Chem. Mater.* **28**, 4453-4459 (2016).
- 5 S9. Hovington, P., Lagacé, M., Guerfi, A., Bouchard, P., Mauger, A., Julien, C. M., Armand,  
6 M. & Zaghib, K. New lithium metal polymer solid state battery for an ultrahigh energy:  
7 nano C-LiFePO<sub>4</sub> versus nano Li<sub>1-x</sub>V<sub>3</sub>O<sub>8</sub>. *Nano Lett.* **15**, 2671-2678 (2015).
- 8 S10. Tan, D. H., Chen, Y. T., Yang, H., Bao, W., Sreenarayanan, B., Doux, J. M., Li, W., Lu,  
9 B., Ham, S. Y., Sayahpour, B., Scharf, J., Wu, E. A., Deysheer, G., Han, H. E., Hah, H. J.,  
10 Jeong, H., Lee, J., Chen, Z. & Meng, Y. S. Carbon-free high-loading silicon anodes  
11 enabled by sulfide solid electrolytes. *Science* **373**, 1494-1499 (2021).
- 12 S11. Lee, M. J., Han, J., Lee, K., Lee, Y. J., Kim, B. G., Jung, K. N., Kim, B. J. & Lee, S. W.  
13 Elastomeric electrolytes for high-energy solid-state lithium batteries. *Nature* **601**, 217-222  
14 (2022).
